# Supplementary material for: Natural Language Processing to Improve Prediction of Incident Atrial Fibrillation Using Electronic Health Records
Source: PubMed Central journal article supplement — J Am Heart Assoc. 2022 Jul 29;11(15):e026014. doi: 10.1161/JAHA.122.026014 (PMC9375475; doi:10.1161/jaha.122.026014), 2022-07-29
Supplement: JAH3-11-e026014-s001.pdf [file JAH3-11-e026014-s001.pdf]

## **SUPPLEMENTAL MATERIAL**

**Table S1. Validated algorithm to ascertain obesity from electronic health record**

|                                                       |                                                                                                                                                                                                                                                                                                                                                                                                                                                                                                                                                                                                                                                                                                                                                                                                                                                                                                                                                       |
|-------------------------------------------------------|-------------------------------------------------------------------------------------------------------------------------------------------------------------------------------------------------------------------------------------------------------------------------------------------------------------------------------------------------------------------------------------------------------------------------------------------------------------------------------------------------------------------------------------------------------------------------------------------------------------------------------------------------------------------------------------------------------------------------------------------------------------------------------------------------------------------------------------------------------------------------------------------------------------------------------------------------------|
| <p><b>Eligibility: Inclusion Criteria</b></p>         | <p><b>Adult patients (18 and older) with</b></p> <ol style="list-style-type: none"> <li><b>1) Height and weight measurement at a frequency based upon patient age from structured data field in physical examination section of electronic health record</b></li> <li><b>2) Assessment of body mass index (BMI = Weight / [Height]<sup>2</sup>) to categorize individuals as follows</b> <ol style="list-style-type: none"> <li><b>1. BMI ≥ 30</b></li> <li><b>2. Most recent BMI ≥29 w/ any BMI ≥30 in the past year</b></li> <li><b>3. No BMI data available</b></li> </ol> </li> <li><b>3) If no BMI data available, obesity define based upon</b> <ol style="list-style-type: none"> <li><b>1. ICD-9/10 diagnosis code or</b></li> <li><b>2. Problem list term</b></li> </ol> </li> </ol>                                                                                                                                                         |
| <p><b>Eligibility: Exclusion Criteria</b></p>         | <ol style="list-style-type: none"> <li><b>1) Most recent BMI &lt; 30</b></li> <li><b>2) Most recent BMI ≤ 29 with no BMI ≥ 30 in the past year</b></li> </ol>                                                                                                                                                                                                                                                                                                                                                                                                                                                                                                                                                                                                                                                                                                                                                                                         |
| <p><b>Frequency of weight/height measurements</b></p> | <ol style="list-style-type: none"> <li><b>1) Weight measurement at a frequency based upon age</b> <ol style="list-style-type: none"> <li><b>a) Patients age ≥65, most recent weight in past 2 years</b></li> <li><b>b) Patients age 40-64, most recent weight in past 3 years</b></li> <li><b>c) Patients age 23-39, most recent weight in past 5 years</b></li> <li><b>d) Patients aged 22, most recent weight in past 4 years</b></li> <li><b>e) Patients aged 21, most recent weight in past 3 years</b></li> <li><b>f) Patients aged 18-20, most recent weight in past 2 years</b></li> </ol> </li> <li><b>2) Height measurement at a frequency based upon age</b> <ol style="list-style-type: none"> <li><b>a) Patients aged ≥28, most recent height in past 10 years</b></li> <li><b>b) Patients aged 27, most recent height in past 9 years</b></li> <li><b>c) Patients aged 26, most recent height in past 8 years</b></li> </ol> </li> </ol> |

|                           |                                                                                                                                                                                                                                                                                                                                                                                                                                                                                                                                                                                                                                                                                          |
|---------------------------|------------------------------------------------------------------------------------------------------------------------------------------------------------------------------------------------------------------------------------------------------------------------------------------------------------------------------------------------------------------------------------------------------------------------------------------------------------------------------------------------------------------------------------------------------------------------------------------------------------------------------------------------------------------------------------------|
|                           | <ul style="list-style-type: none"> <li>d) Patients aged 25, most recent height in past 7 years</li> <li>e) Patients aged 24, most recent height in past 6 years</li> <li>f) Patients aged 23, most recent height in past 5 years</li> <li>g) Patients aged 22, most recent height in past 4 years</li> <li>h) Patients aged 21, most recent height in past 3 years</li> <li>i) Patients aged 18-20, most recent height in past 2 years</li> </ul>                                                                                                                                                                                                                                        |
| <b>Data Sources</b>       | <ul style="list-style-type: none"> <li>1) Problem list terms (any prior)</li> <li>2) ICD 9/10 diagnosis codes in prior 3 years <ul style="list-style-type: none"> <li>a) Hospitalization or any outpatient visit</li> <li>b) Any primary or secondary codes</li> </ul> </li> <li>3) Physical exam / flow sheets</li> </ul>                                                                                                                                                                                                                                                                                                                                                               |
| <b>Problem List Terms</b> | <b>Obese; Obesity; Morbid Obesity; Simple Obesity; Body Mass Index 30 + -Obesity</b>                                                                                                                                                                                                                                                                                                                                                                                                                                                                                                                                                                                                     |
| <b>ICD-9 codes</b>        | <b>278.00: Obesity, unspecified</b><br><b>278.01: Morbid obesity</b><br><b>278.03: Obesity Hypoventilation syndrome</b>                                                                                                                                                                                                                                                                                                                                                                                                                                                                                                                                                                  |
| <b>ICD-10 Codes</b>       | <b>E66.01: Morbid (severe) obesity due to excess calories</b><br><b>E66.09: Other obesity due to excess calories</b><br><b>E66.1: Drug-induced obesity</b><br><b>E66.2: Morbid (severe) obesity with alveolar hypoventilation</b><br><b>E66.3: Overweight</b><br><b>E66.8: Other obesity</b><br><b>E66.9: Obesity, unspecified</b><br><b>Z68.30: Body mass index (BMI) 30.0-30.9, adult</b><br><b>Z68.31: Body mass index (BMI) 31.0-31.9, adult</b><br><b>Z68.32: Body mass index (BMI) 32.0-32.9, adult</b><br><b>Z68.33: Body mass index (BMI) 33.0-33.9, adult</b><br><b>Z68.34: Body mass index (BMI) 34.0-34.9, adult</b><br><b>Z68.35: Body mass index (BMI) 35.0-35.9, adult</b> |

|                                             |                                                                                                                                                                                                                                                                                                                                                                                                                                                                                                                                  |
|---------------------------------------------|----------------------------------------------------------------------------------------------------------------------------------------------------------------------------------------------------------------------------------------------------------------------------------------------------------------------------------------------------------------------------------------------------------------------------------------------------------------------------------------------------------------------------------|
|                                             | <b>Z68.36: Body mass index (BMI) 35.0-35.9, adult</b><br><b>Z68.37: Body mass index (BMI) 37.0-37.9, adult</b><br><b>Z68.38: Body mass index (BMI) 38.0-38.9, adult</b><br><b>Z68.39: Body mass index (BMI) 39.0-39.9, adult</b><br><b>Z68.41: Body mass index (BMI) 40.0-44.9, adult</b><br><b>Z68.42: Body mass index (BMI) 45.0-49.9, adult</b><br><b>Z68.43: Body mass index (BMI) 50-59.9 , adult</b><br><b>Z68.44: Body mass index (BMI) 60.0-69.9, adult</b><br><b>Z68.45: Body mass index (BMI) 70 or greater, adult</b> |
| <b>Cut off values for height and weight</b> | <b>1) Max height: 84 inches</b><br><b>2) Min height: 48 inches</b><br><b>3) Max weight: 515 pounds</b><br><b>4) Min weight: 60 pounds</b>                                                                                                                                                                                                                                                                                                                                                                                        |
| <b>Chart Review Selection Criteria</b>      | <b>1) Blinded list of 630 patients (25 positive and 10 negative patients per primary care practice in the network)</b><br><b>2) Review performed by a Research Nurse</b>                                                                                                                                                                                                                                                                                                                                                         |
| <b>Chart Review Results</b>                 | <b>Sensitivity: 98%</b><br><b>Specificity: 97%</b><br><b>Positive predictive value: 97%</b><br><b>Negative predictive value: 96%</b>                                                                                                                                                                                                                                                                                                                                                                                             |

BMI: body mass index

**Table S2. ICD-9/10 codes used to define codified predictors not ascertained using validated algorithms**

| Variable                                 | ICD-9/10 Codes                                                                                                                                                                                                                                                                                                                                                                                                                                                                                                                                                                                                                                                                                                               |
|------------------------------------------|------------------------------------------------------------------------------------------------------------------------------------------------------------------------------------------------------------------------------------------------------------------------------------------------------------------------------------------------------------------------------------------------------------------------------------------------------------------------------------------------------------------------------------------------------------------------------------------------------------------------------------------------------------------------------------------------------------------------------|
| Myocardial Infarction                    | 410.00, 410.01, 410.02, 410.10, 410.11, 410.12, 410.20, 410.21, 410.22, 410.30, 410.31, 410.32, 410.40, 410.41, 410.42, 410.50, 410.51, 410.52, 410.60, 410.61, 410.62, 410.70, 410.71, 410.72, 410.80, 410.81, 410.82, 410.90, 410.91, 410.92, 412, 429.79, I21.01, I21.02, I21.09, I21.11, I21.19, I21.21, I21.29, I21.3, I21.4, I21.9, I21.A1, I21.A9, I22.0, I22.1, I22.2, I22.8, I22.9, I23.0, I23.1, I23.2, I23.3, I23.4, I23.5, I23.6, I23.7, I23.8, I24.1, I25.2,                                                                                                                                                                                                                                                    |
| Chronic Kidney Disease                   | 250.4, 250.41, 250.42, 250.43, 403, 403.01, 403.1, 403.11, 403.9, 403.91, 404, 404.01, 404.02, 404.03, 404.1, 404.11, 404.12, 404.13, 404.9, 404.91, 404.92, 404.93, 582, 582.1, 582.2, 582.4, 582.81, 582.89, 582.9, 583, 583.1, 583.2, 583.4, 583.6, 583.7, 583.81, 583.89, 583.9, 584.5, 584.6, 584.7, 584.8, 584.9, 585.1, 585.2, 585.3, 586, 587, 588, 588.81, 588.89, 588.9, 753, 753.12, 753.13, 753.14, 753.15, 753.16, 753.17, 753.19, 788.5, 792.5, V42.0, V45.11, V45.12, V56.0, V56.1, V56.2, V56.31, V56.32, V56.8, E08.22, E09.22, E10.22, E11.22, E13.22, I12.0, I12.9, I13.0, I13.1, I13.10, I13.11, I13.2, N18.1, N18.2, N18.3, N18.4, N18.5, N18.9, N19, N99.0, R34, Z49.01, Z49.02, Z49.31, Z49.32, Z99.2 |
| Chronic Kidney Disease - Severe          | 403.01, 403.11, 403.91, 404.02, 404.03, 404.12, 404.13, 404.92, 404.93, 585.4, 585.5, 585.6, 788.5, 792.5, V42.0, V45.11, V45.12, V56.0, V56.1, V56.2, V56.31, V56.32, V56.8, I12.0, I13.11, I13.2, N18.4, N18.5, N18.6, R34, Z99.2                                                                                                                                                                                                                                                                                                                                                                                                                                                                                          |
| Hyperlipidemia                           | 272, 272.1, 272.2, 272.3, 272.4, 272.5, 272.6, 272.7, 272.8, 272.9, 759.9, E71.30, E75.21, E75.22, E75.5, E75.6, E77.0, E77.1, E78.0, E78.1, E78.2, E78.3, E78.4, E78.5, E78.6, E78.7, E78.70, E78.79, E78.81, E78.89, E78.9, E88.1, E88.89                                                                                                                                                                                                                                                                                                                                                                                                                                                                                  |
| Valvular Disease                         | 35.05, 35.12, 35.10, 35.11, 35.14, 35.20, 35.21, 35.06, 35.13, 35.22, 35.24, 35.25, 35.26, 35.27, 35.28, 35.96, 35.23, 394.1, 394.2, 396.3, 396.2, 396.9, 394.9, 396.0, 396.1, 396.8, 394.0, V42.3, V43.3, I05.0, I05.1, I05.2, I05.8, I05.9, I06.8, I06.9, I07.8, I07.9, I08.0, I08.1, I08.3, I08.8, I08.9, I09.1, I34.0, I34.1, I34.2, I34.8, I34.9, I35.0, I35.1, I35.2, I35.8, I35.9, I36.0, I36.1, I36.2, I36.8, I36.9, I37.0, I37.1, I37.2, I37.8, I37.9, I38                                                                                                                                                                                                                                                          |
| Prior Stroke / Transient Ischemic Attack | 362.31, 362.32, 362.33, 362.34, 388.02, 430, 431, 432.9, 433.01, 433.11, 433.21, 433.31, 433.81, 433.91, 434.00, 434.01, 434.10, 434.11, 434.91, 435.0, 435.1, 435.2,                                                                                                                                                                                                                                                                                                                                                                                                                                                                                                                                                        |

|                          |                                                                                                                                                                                                                                                                                                                                                                                                                                                                                                                                                                                                                                                                                                                                                                                                                                                                                                                                                                                                                                                                                                                                                                                                                                                                                                                                                                                                                                                                                                                                                                                                                                                                                                                                                                                                          |
|--------------------------|----------------------------------------------------------------------------------------------------------------------------------------------------------------------------------------------------------------------------------------------------------------------------------------------------------------------------------------------------------------------------------------------------------------------------------------------------------------------------------------------------------------------------------------------------------------------------------------------------------------------------------------------------------------------------------------------------------------------------------------------------------------------------------------------------------------------------------------------------------------------------------------------------------------------------------------------------------------------------------------------------------------------------------------------------------------------------------------------------------------------------------------------------------------------------------------------------------------------------------------------------------------------------------------------------------------------------------------------------------------------------------------------------------------------------------------------------------------------------------------------------------------------------------------------------------------------------------------------------------------------------------------------------------------------------------------------------------------------------------------------------------------------------------------------------------|
|                          | <p>435.3, 435.8, 435.9, 437.1, 437.7, 437.9, 438.10, 438.11, 438.12, 438.13, 438.14, 438.20, 438.21, 438.22, 438.81, 438.82, 438.83, 438.89, 438.9, 997.02, V12.54, G45.0, G45.1, G45.2, G45.3, G45.4, G45.8, G46.3, G46.4, H34.00, H34.01, H34.02, H34.03, H34.10, H34.11, H34.12, H34.13, H34.211, H34.212, H34.213, H34.219, H34.231, H34.232, H34.233, H34.239, H93.099, I60.9, I61.9, I62.9, I63.00, I63.011, I63.012, I63.019, I63.111, I63.112, I63.119, I63.12, I63.131, I63.132, I63.139, I63.19, I63.20, I63.211, I63.212, I63.219, I63.22, I63.231, I63.232, I63.239, I63.29, I63.30, I63.311, I63.312, I63.319, I63.321, I63.322, I63.329, I63.331, I63.332, I63.339, I63.341, I63.342, I63.349, I63.40, I63.411, I63.412, I63.419, I63.421, I63.422, I63.429, I63.431, I63.432, I63.439, I63.49, I63.50, I63.511, I63.512, I63.519, I63.521, I63.522, I63.529, I63.531, I63.532, I63.539, I63.541, I63.542, I63.549, I63.59, I63.6, I63.8, I63.9, I66.01, I66.02, I66.03, I66.09, I66.11, I66.12, I66.13, I66.19, I66.21, I66.22, I66.23, I66.29, I66.3, I66.8, I66.9, I67.81, I67.82, I67.841, I67.848, I67.89, I67.9, I69.80, I69.81, I69.820, I69.821, I69.822, I69.823, I69.828, I69.831, I69.832, I69.833, I69.834, I69.839, I69.841, I69.842, I69.843, I69.844, I69.849, I69.851, I69.852, I69.853, I69.854, I69.859, I69.861, I69.862, I69.863, I69.864, I69.865, I69.869, I69.890, I69.891, I69.892, I69.893, I69.898, I69.90, I69.91, I69.920, I69.921, I69.922, I69.923, I69.928, I69.931, I69.932, I69.933, I69.934, I69.939, I69.941, I69.942, I69.943, I69.944, I69.949, I69.951, I69.952, I69.953, I69.954, I69.959, I69.961, I69.962, I69.963, I69.964, I69.965, I69.969, I69.990, I69.991, I69.992, I69.993, I69.998, I97.810, I97.811, I97.820, I97.821, Z86.73, G45.9</p> |
| Systemic Atherosclerosis | <p>441, 441.01, 441.02, 441.03, 441.1, 441.2, 441.3, 441.4, 441.5, 441.6, 441.7, 441.9, I70.0, I71.00, I71.01, I71.02, I71.03, I71.1, I71.2, I71.3, I71.4, I71.5, I71.6, I71.8, I71.9</p>                                                                                                                                                                                                                                                                                                                                                                                                                                                                                                                                                                                                                                                                                                                                                                                                                                                                                                                                                                                                                                                                                                                                                                                                                                                                                                                                                                                                                                                                                                                                                                                                                |
| Cerebral Atherosclerosis | <p>433, 433.01, 433.1, 433.11, 433.2, 433.21, 433.3, 433.31, 433.8, 433.81, 433.91, 434.9, 434.91, 435, 435.1, 435.2, 435.3, 437, 437.1, 438.13, 438.14, G45.0, G45.8, I63.00, I63.011, I63.012, I63.019, I63.111, I63.112, I63.119, I63.12, I63.131, I63.132, I63.139, I63.19, I63.20, I63.211, I63.212, I63.219, I63.22, I63.231, I63.232, I63.239, I63.29, I63.30, I63.311, I63.312, I63.319, I63.321, I63.322, I63.329, I63.331, I63.332, I63.339, I63.341, I63.342, I63.349, I63.40, I63.411, I63.412,</p>                                                                                                                                                                                                                                                                                                                                                                                                                                                                                                                                                                                                                                                                                                                                                                                                                                                                                                                                                                                                                                                                                                                                                                                                                                                                                          |

|                                       |                                                                                                                                                                                                                                                                                                                                                                                                                                                                                                                                                                                                                                                                                                                                                                                                                                                                                                                                                                                                                                                                                                 |
|---------------------------------------|-------------------------------------------------------------------------------------------------------------------------------------------------------------------------------------------------------------------------------------------------------------------------------------------------------------------------------------------------------------------------------------------------------------------------------------------------------------------------------------------------------------------------------------------------------------------------------------------------------------------------------------------------------------------------------------------------------------------------------------------------------------------------------------------------------------------------------------------------------------------------------------------------------------------------------------------------------------------------------------------------------------------------------------------------------------------------------------------------|
|                                       | I63.419, I63.421, I63.422, I63.429, I63.431, I63.432, I63.439, I63.49, I63.50, I63.511, I63.512, I63.519, I63.521, I63.522, I63.529, I63.531, I63.532, I63.539, I63.541, I63.542, I63.549, I63.59, I65.01, I65.02, I65.03, I65.09, I65.1, I65.21, I65.22, I65.23, I65.29, I65.8, I65.9, I66.9, I67.2, I67.81, I67.82, I67.89                                                                                                                                                                                                                                                                                                                                                                                                                                                                                                                                                                                                                                                                                                                                                                    |
| Thyrotoxicosis                        | 242.00, 242.01, 242.10, 242.11, 242.20, 242.21, 242.30, 242.31, 242.40, 242.41, 242.80, 242.81, 242.90, 242.91, E05.00, E05.01, E05.10, E05.20, E05.21, E05.80, E05.41, E05.90, E05.30, E05.31, E05.40, E05.81, E05.11, E05.91                                                                                                                                                                                                                                                                                                                                                                                                                                                                                                                                                                                                                                                                                                                                                                                                                                                                  |
| Hypothyroidism                        | 243, 244, 244.1, 244.8, 244.9, 245, 245.1, 245.2, 245.9, E03.1, E03.8, E03.9, E06.1, E06.3, E06.5, E06.9, E89.0                                                                                                                                                                                                                                                                                                                                                                                                                                                                                                                                                                                                                                                                                                                                                                                                                                                                                                                                                                                 |
| Pulmonary Disease                     | 490, 491.0, 491.1, 491.20, 491.21, 491.22, 491.8, 491.9, 492.0, 492.8, 493.00, 493.01, 493.02, 493.10, 493.11, 493.12, 493.20, 493.21, 493.22, 493.81, 493.82, 493.90, 493.91, 493.92, 494.0, 494.1, 495.0, 495.1, 495.2, 495.3, 495.4, 495.5, 495.6, 495.7, 495.8, 495.9, 496, 500, 501, 502, 503, 504, 505, 506.0, 506.1, 506.2, 506.3, 506.4, 506.9, A15.0, A52.72, B38.1, B39.1, B40.1, D86.0, D86.2, E84.0, J40, J41.0, J41.1, J41.8, J42, J43.0, J43.1, J43.2, J43.8, J43.9, J44, J44.0, J44.1, J44.9, J45.20, J45.21, J45.22, J45.30, J45.31, J45.32, J45.40, J45.41, J45.42, J45.50, J45.51, J45.52, J45.901, J45.902, J45.909, J45.990, J45.991, J45.998, J47, J47.0, J47.1, J47.9, J60, J61, J62.0, J62.8, J63.0, J63.1, J63.2, J63.3, J63.4, J63.5, J63.6, J64, J65, J66.0, J66.1, J66.2, J66.8, J67.0, J67.2, J67.4, J67.5, J67.6, J67.7, J67.8, J67.9, J671, J673, J68.0, J68.1, J68.2, J68.3, J68.4, J68.9, J70.1, J70.3, J70.4, J81.8, J82, J84.02, J84.03, J84.10, J84.112, J84.115, J84.17, J84.82, J84.842, J84.89, J84.9, J95.3, J98.2, J98.3, M30.1, M32.13, M34.81, M35.02 |
| Chronic Obstructive Pulmonary Disease | 491, 491.0, 491.1, 491.2, 491.20, 491.21, 491.22, 491.8, 491.9, 492, 492.0, 492.8, 493.2, 493.20, 493.21, 493.22, 496, J44, J44.0, J44.1, J44.9, J41, J41.0, J41.1, J41.8, J42, J43, J43.1, J43.2, J43.8, J43.9, J45.5, J45.50, J45.51, J45.52                                                                                                                                                                                                                                                                                                                                                                                                                                                                                                                                                                                                                                                                                                                                                                                                                                                  |
| Congenital Heart Disease              | 745.0, 745.1, 745.2, 745.4, 745.5, 746.1, 746.2, 746.3, 746.4, 746.5, 746.6, 746.7, 746.81, 746.82, 746.83, 746.85, 746.86, 747.1, 747.11, 747.29, 747.31, 747.49, 745.7, 745.11, 745.3, 745.12, 745.8, 746.9, 745.69, 745.9, 746.01, 746.02, 746.09, 746.00, 746.1, 746.89, 747.6, 747.0, 747.9, 748.5, Q20.0, Q20.3, Q21.3, Q21.0, Q21.1, Q22.4, Q22.5, Q23.0, Q23.1, Q23.2, Q23.3, Q23.4, Q24.4, Q24.2, Q24.3, Q24.5, Q24.6, Q25.1, Q25.2, Q25.3, Q25.4, Q25.8, Q25.9, Q25.5, Q25.6,                                                                                                                                                                                                                                                                                                                                                                                                                                                                                                                                                                                                         |

|                               |                                                                                                                                                                                                                                                                                                                                                                                                                                                                                                                                                                                                                             |
|-------------------------------|-----------------------------------------------------------------------------------------------------------------------------------------------------------------------------------------------------------------------------------------------------------------------------------------------------------------------------------------------------------------------------------------------------------------------------------------------------------------------------------------------------------------------------------------------------------------------------------------------------------------------------|
|                               | Q25.7, Q26, Q20.8, Q20.1, Q20.2, Q20.4, Q20.5, Q20.6, Q20.8, Q20.9, Q21.2, Q21.4, Q21.8, Q21.9, Q22.0, Q22.1, Q22.2, Q22.3, Q22.6, Q22.8, Q22.9, Q23.8, Q23.9, Q27.4, Q24.8, Q24.9, Q25.0, Q28.9, Q33.2                                                                                                                                                                                                                                                                                                                                                                                                                     |
| Cardiomegaly                  | 429.3, I51.7                                                                                                                                                                                                                                                                                                                                                                                                                                                                                                                                                                                                                |
| Mitral Valve Disorder         | 394, 394.0, 394.1, 394.2, 394.9, 424.0, I34, I34.0, I34.1, I34.2, I34.8, I34.9, I05, I05.0, I05.1, I05.2, I05.8, I05.9                                                                                                                                                                                                                                                                                                                                                                                                                                                                                                      |
| Mitral Stenosis               | 394.0, 394.2, I05.0, I05.2, I34.2                                                                                                                                                                                                                                                                                                                                                                                                                                                                                                                                                                                           |
| Mitral Insufficiency          | 394.1, 394.2, I05.1, I34.0, I05.2                                                                                                                                                                                                                                                                                                                                                                                                                                                                                                                                                                                           |
| Mitral Valve Prolapse         | I34.1, 424.0                                                                                                                                                                                                                                                                                                                                                                                                                                                                                                                                                                                                                |
| Supraventricular Tachycardia  | 427.0, I47.1                                                                                                                                                                                                                                                                                                                                                                                                                                                                                                                                                                                                                |
| Premature Atrial Contractions | 427.61, I49.1                                                                                                                                                                                                                                                                                                                                                                                                                                                                                                                                                                                                               |
| Alcohol Use – Heavy           | 303, 303.0, 303.00, 303.01, 303.02, 303.9, 303.90, 303.91, 303.92, 305, 305.00, 305.01, 305.02, F10.1, F10.10, F10.12, F10.120, F10.121, F10.129, F10.14, F10.15, F10.150, F10.151, F10.159, F10.18, F10.180, F10.181, F10.182, F10.188, F10.19, F10.2, F10.20, F10.22, F10.220, F10.221, F10.229, F10.23, F10.230, F10.231, F10.232, F10.239, F10.24, F10.25, F10.250, F10.251, F10.259, F10.26, F10.27, F10.28, F10.280, F10.281, F10.282, F10.288, F10.9, F10.92, F10.920, F10.921, F10.929, F10.94, F10.95, F10.950, F10.951, F10.959, F10.96, F10.97, F10.98, F10.980, F10.981, F10.982, F10.988, F10.99               |
| Pericarditis                  | 036.41, 074.21, 093.81, 420, 098.83, 420.9, 420.99, 423.1, 423.2, 393, 420.91, 420.9, 115.93, 391.0, 115.03, 115.13, 115.93, 423.0, 423.3, 423.8, 423.9, 420.0, A39.53, B33.23, I01.0, I09.2, I30.0, I30.1, I30.8, I30.9, I31.0, I31.1, I31.2, I31.3, I31.4, I31.8, I31.9, I32                                                                                                                                                                                                                                                                                                                                              |
| Myocarditis                   | 42.9, 032.82, 036.43, 074.23, 093.82, 13.03, 391.2, 398.0, 422.0, 422.90, 422.91, 422.92, 422.93, 422.99, I40.0, I40.1, I40.8, I40.9, I41, I51.4, J10.82, J11.82, A38.1, A39.52, B26.82, B33.22, B58.81, D86.85, I01.2, I09.0                                                                                                                                                                                                                                                                                                                                                                                               |
| Obstructive Sleep Apnea       | 780.57, 327.23, G47.30, G47.33, G47.39                                                                                                                                                                                                                                                                                                                                                                                                                                                                                                                                                                                      |
| Prior Cardiac Surgery         | 35.00, 35.01, 35.02, 35.03, 35.04, 35.11, 35.22, 35.31, 35.32, 35.33, 35.34, 35.35, 35.39, 35.41, 35.42, 35.5, 35.51, 35.52, 35.53, 35.54, 35.55, 35.6, 35.61, 35.62, 35.63, 35.7, 35.71, 35.72, 35.73, 35.8, 36.03, 36.04, 36.07, 36.09, 36.10, 36.1, 36.11, 36.12, 36.13, 36.14, 36.15, 36.16, 36.17, 36.19, 36.2, 37.0, 37.1, 37.11, 37.12, 37.2, 37.21, 37.22, 37.23, 37.24, 37.25, 37.26, 37.27, 37.28, 37.29, 37.3, 37.31, 37.32, 37.33, 37.34, 37.35, 37.36, 37.37, 37.4, 37.41, 37.49, 37.7, 37.8, 37.9, I97.190, Z98.61, I25.700, I25.701, I25.708, I25.709, I25.710, I25.711, I25.718, I25.719, I25.720, I25.721, |



|                             |                                                                                                                                                                                                                                                                                                                                                                                                                                                                                                                                                                                                                                                                                                                                                                                                                            |
|-----------------------------|----------------------------------------------------------------------------------------------------------------------------------------------------------------------------------------------------------------------------------------------------------------------------------------------------------------------------------------------------------------------------------------------------------------------------------------------------------------------------------------------------------------------------------------------------------------------------------------------------------------------------------------------------------------------------------------------------------------------------------------------------------------------------------------------------------------------------|
|                             | I25.728, I25.729, I25.730, I25.731, I25.738, I25.739, I25.790, I25.791, I25.798, I25.799, I25.810, I25.811, I25.812, I97.0, I97.110, I97.120, I97.130, V45.82, Z45.018, Z45.02, Z45.09, Z48.21, Z48.280, Z95.1, Z95.2, Z95.811, Z95.812                                                                                                                                                                                                                                                                                                                                                                                                                                                                                                                                                                                    |
| Hypertrophic Cardiomyopathy | 425.1, 425.11, 425.18, I42.1, I42.2                                                                                                                                                                                                                                                                                                                                                                                                                                                                                                                                                                                                                                                                                                                                                                                        |
| Other Cardiomyopathy        | 425, 425.0, 425.2, 425.3, 425.4, 425.5, 425.7, 425.8, 425.9, I42, I42.0, I42.3, I42.4, I42.5, I42.6, I42.7, I42.8, I42.9                                                                                                                                                                                                                                                                                                                                                                                                                                                                                                                                                                                                                                                                                                   |
| Chronic Liver Disease       | 070.0, 070.20, 070.21, 070.22, 070.23, 070.30, 070.31, 070.32, 070.33, 070.41, 070.42, 070.43, 070.49, 070.51, 070.52, 070.53, 070.54, 070.59, 070.6, 070.70, 070.71, 070.9, 273.4, 275.01, 275.1, 453.0, 570, 571.1, 571.3, 571.40, 571.41, 571.49, 571.8, 571.9, 573.0, 573.1, 573.2, 573.3, 573.4, 573.8, 573.9, 576.1, B15.0, B15.9, B16.0, B16.1, B16.2, B16.9, B17.0, B17.10, B17.11, B17.2, B17.8, B17.9, B18.0, B18.1, B18.2, B18.8, B18.9, B19.0, B19.10, B19.11, B19.20, B19.21, B19.9, B94.2, K70.0, K70.10, K70.11, K70.2, K70.30, K70.31, K70.9, K71.0, K71.10, K71.11, K71.2, K71.3, K71.4, K71.50, K71.51, K71.6, K71.7, K73.0, K73.1, K73.2, K73.8, K73.9, K74.0, K74.1, K75.3, K75.4, K75.8, K75.89, K75.9, K76.89, Z22.50, Z22.51, Z22.52, Z22.59, K72.00, K72.01, K72.1, K72.10, K72.22, K72.90, K72.91 |
| Cirrhosis                   | 571.2, 571.5, 571.6, K70.40, K70.41, K71.9, K74.2, K74.3, K74.5, K74.60, K74.69, K744, K7460, K75.0, K75.2                                                                                                                                                                                                                                                                                                                                                                                                                                                                                                                                                                                                                                                                                                                 |
| Liver Complications         | 456.0, 456.20, 456.1, 456.21, 572.2, 572.3, 572.4, 572.8, 573.5, 567.0, 567.23, 567.21, 567.29, 567.1, 567.89, 567.9, 789.5, 789.59, K76.0, K76.1, K76.2, K76.3, I85.01, I85.11, I85, K76.6, K76.7, K76.81, K76.80, K76.8, K65.0, K65.2, K65.8, K65.9, R18, R18.0, R18.8                                                                                                                                                                                                                                                                                                                                                                                                                                                                                                                                                   |

ICD: International Classification of Disease

**Table S3. CHARGE-AF score components and weights\***

| <b>Covariate</b>                                      | <b>Estimated <math>\beta</math> (SE)</b> |
|-------------------------------------------------------|------------------------------------------|
| Age (per 5-year increase)                             | 0.508 (0.022)                            |
| Race (white)                                          | 0.465 (0.093)                            |
| Height (per 10 cm increase), cm                       | 0.248 (0.036)                            |
| Weight (per 15 kg increase), kg                       | 0.115 (0.033)                            |
| Systolic blood pressure (per 20 mmHg increase), mmHg  | 0.197 (0.033)                            |
| Diastolic blood pressure (per 10 mmHg increase), mmHg | -0.101 (0.032)                           |
| Current smoker                                        | 0.359 (0.091)                            |
| Anti-hypertensive medication use                      | 0.349 (0.063)                            |
| Diabetes                                              | 0.237 (0.073)                            |
| Heart failure                                         | 0.701 (0.106)                            |
| Myocardial infarction                                 | 0.496 (0.089)                            |

CHARGE-AF: Cohorts for Heart and Aging Research in Genomic Epidemiology Atrial Fibrillation; SE: standard error

\* Alonso A, Krijthe BP, Aspelund T, et al. Simple risk model predicts incidence of atrial fibrillation in a racially and geographically diverse population: the CHARGE-AF consortium. *J Am Heart Assoc.* 2013;2(2):e000102.

**Table S4. Concept unique identifiers (CUIs) mapped to potential predictors from linkage to the Unified Medical Language System (UMLS)\***

| <b>Variable</b>                       | <b>CUI</b> |
|---------------------------------------|------------|
| Alcohol Abuse                         | C0085762   |
| Alcohol Abuse                         | C0001973   |
| Alcohol Abuse                         | C0560219   |
| Cardiomegaly                          | C0018800   |
| Cerebral Atherosclerosis              | C4024924   |
| Cerebrovascular disease               | C0007775   |
| Cerebrovascular disease               | C0007820   |
| Chronic Kidney Disease - Severe       | C2316810   |
| Chronic Kidney Disease                | C1561643   |
| Chronic Liver Disease                 | C0341439   |
| Chronic Liver Disease                 | C0085605   |
| Chronic Obstructive Pulmonary Disease | C0024117   |
| Chronic Obstructive Pulmonary Disease | C0034067   |
| Chronic Obstructive Pulmonary Disease | C0008677   |
| Cirrhosis                             | C0023890   |
| Congenital Heart Disease              | C0152021   |
| Congestive heart failure              | C0018802   |
| Coronary artery disease               | C0010054   |
| Coronary artery disease               | C0010068   |
| Diabetes                              | C0011849   |
| Diabetes                              | C0011860   |
| Diabetes                              | C0011854   |
| Hyperlipidemia                        | C0020473   |
| Hypertension                          | C0020538   |
| Hypertrophic Cardiomyopathy           | C0007194   |
| Hypertrophic Cardiomyopathy           | C4551472   |
| Hypothyroidism                        | C0020676   |
| Left atrial enlargement               | C0232309   |
| Left atrial enlargement               | C0232310   |
| Left atrial enlargement               | C0238705   |
| Left Ventricular Hypertrophy          | C0149721   |
| Left Ventricular Hypertrophy          | C0232306   |
| Left Ventricular Hypertrophy          | C0344398   |
| Liver Complications                   | C0015695   |
| Liver Complications                   | C0267821   |
| Liver Complications                   | C0014867   |
| Liver Complications                   | C0019151   |
| Liver Complications                   | C0020541   |
| Liver Complications                   | C0019212   |
| Liver Complications                   | C0600452   |

|                               |          |
|-------------------------------|----------|
| Mitral Insufficiency          | C0026266 |
| Mitral Stenosis               | C0026269 |
| Mitral Valve Disease          | C0026265 |
| Mitral Valve Prolapse         | C0026267 |
| Myocardial Infarction         | C0027051 |
| Myocarditis                   | C0027059 |
| Obesity                       | C0028754 |
| Obesity                       | C0028756 |
| Obstructive Sleep Apnea       | C0520679 |
| Other Cardiomyopathy          | C0878544 |
| Other Cardiomyopathy          | C0007193 |
| Other Cardiomyopathy          | C0007192 |
| Other Cardiomyopathy          | C0264834 |
| Pericarditis                  | C0031046 |
| Peripheral vascular disease   | C0085096 |
| Premature atrial contractions | C0033036 |
| Prolonged PR Interval         | C0600125 |
| Pulmonary Disease             | C0024115 |
| Shortened PR Interval         | C0520878 |
| Stroke                        | C0038454 |
| Supraventricular Tachycardia  | C0039240 |
| Supraventricular Tachycardia  | C1963244 |
| Supraventricular Tachycardia  | C3815188 |
| Supraventricular Tachycardia  | C0030590 |
| Systemic Atherosclerosis      | C0155733 |
| Thyrotoxicosis                | C0040156 |
| Thyrotoxicosis                | C0020550 |
| Transient Ischemic Attack     | C0007787 |
| Valvular Disease              | C3258293 |
| Valvular Disease              | C0018824 |

---

CUI: concept unique identifier; UMLS: Unified Medical Language System

\* Bodenreider O. The Unified Medical Language System (UMLS): integrating biomedical terminology. *Nucleic Acids Res.* 2004;32:D267-270.

**Table S5. C-statistics and hazard ratios in prediction models that exclude race and include social determinants of health**

|                                                      | <b>C-statistic<br/>(95% CI)</b> | <b>Hazard Ratio<br/>(95% CI)</b> |
|------------------------------------------------------|---------------------------------|----------------------------------|
| <b>Development (Add insurance)</b>                   |                                 |                                  |
| Codified+NLP                                         | 0.742 (0.733-0.751)             |                                  |
| ≥ 84 <sup>th</sup> percentile                        |                                 | 15.91 (12.88-19.64)              |
| 50-<84 <sup>th</sup> percentile                      |                                 | 5.74 (4.65-7.10)                 |
| 16-<50 <sup>th</sup> percentile                      |                                 | 2.32 (1.86-2.90)                 |
| < 16 <sup>th</sup> percentile                        |                                 | -                                |
| Codified-only                                        | 0.728 (0.719-0.737)             |                                  |
| ≥ 84 <sup>th</sup> percentile                        |                                 | 12.80 (10.55-15.52)              |
| 50-<84 <sup>th</sup> percentile                      |                                 | 4.64 (3.82-5.63)                 |
| 16-<50 <sup>th</sup> percentile                      |                                 | 2.17 (1.77-2.66)                 |
| < 16 <sup>th</sup> percentile                        |                                 | -                                |
| <b>Development (Add insurance + Income)*</b>         |                                 |                                  |
| Codified+NLP                                         | 0.741 (0.732-0.750)             |                                  |
| ≥ 84 <sup>th</sup> percentile                        |                                 | 15.44 (12.52-19.04)              |
| 50-<84 <sup>th</sup> percentile                      |                                 | 5.81 (4.71-7.17)                 |
| 16-<50 <sup>th</sup> percentile                      |                                 | 2.29 (1.83-2.86)                 |
| < 16 <sup>th</sup> percentile                        |                                 | -                                |
| Codified-only                                        | 0.727 (0.717-0.736)             |                                  |
| ≥ 84 <sup>th</sup> percentile                        |                                 | 12.59 (10.33-15.36)              |
| 50-<84 <sup>th</sup> percentile                      |                                 | 4.68 (3.84-5.72)                 |
| 16-<50 <sup>th</sup> percentile                      |                                 | 2.13 (1.73-2.63)                 |
| < 16 <sup>th</sup> percentile                        |                                 | -                                |
| <b>Internal Validation (Add insurance)</b>           |                                 |                                  |
| Codified+NLP                                         | 0.731 (0.716-0.746)             |                                  |
| ≥ 84 <sup>th</sup> percentile                        |                                 | 12.91 (9.42-17.71)               |
| 50-<84 <sup>th</sup> percentile                      |                                 | 4.38 (3.18-6.02)                 |
| 16-<50 <sup>th</sup> percentile                      |                                 | 2.00 (1.43-2.80)                 |
| < 16 <sup>th</sup> percentile                        |                                 | -                                |
| Codified-only                                        | 0.722 (0.707-0.737)             |                                  |
| ≥ 84 <sup>th</sup> percentile                        |                                 | 12.02 (8.76-16.50)               |
| 50-<84 <sup>th</sup> percentile                      |                                 | 4.74 (3.45-6.52)                 |
| 16-<50 <sup>th</sup> percentile                      |                                 | 1.96 (1.40-2.74)                 |
| < 16 <sup>th</sup> percentile                        |                                 | -                                |
| <b>Internal Validation (Add insurance + Income)*</b> |                                 |                                  |
| Codified+NLP                                         | 0.731 (0.716-0.746)             |                                  |
| ≥ 84 <sup>th</sup> percentile                        |                                 | 12.72 (9.27-17.46)               |
| 50-<84 <sup>th</sup> percentile                      |                                 | 4.26 (3.09-5.86)                 |

|                                 |                     |                    |
|---------------------------------|---------------------|--------------------|
| 16-<50 <sup>th</sup> percentile |                     | 1.95 (1.39-2.73)   |
| < 16 <sup>th</sup> percentile   |                     | -                  |
| Codified-only                   | 0.722 (0.707-0.738) |                    |
| ≥ 84 <sup>th</sup> percentile   |                     | 11.36 (8.27-15.60) |
| 50-<84 <sup>th</sup> percentile |                     | 4.55 (3.31-6.25)   |
| 16-<50 <sup>th</sup> percentile |                     | 1.99 (1.42-2.78)   |
| < 16 <sup>th</sup> percentile   |                     | -                  |

---

NLP: natural language processing; CI: confidence interval

\* Income represents proportion of population by zip code with income < \$50,000 from 2008-2012 ascertained from Melendez, Robert, Clarke, Philippa, Khan, Anam, Gomez-Lopez, Iris, Li, Mao, and Chenoweth, Megan. National Neighborhood Data Archive (NaNDA): Socioeconomic Status and Demographic Characteristics of ZIP Code Tabulation Areas, United States, 2008-2017. Ann Arbor, MI: Inter-university Consortium for Political and Social Research [distributor], 2020-07-30. <https://doi.org/10.3886/E120462V1>. Missing income data in development population: n=1,498; Missing income data in internal validation population: n=507

**Table S6. Hazard ratios and 95% confidence intervals for incidence of AF by risk groups defined by the 16<sup>th</sup>, 50<sup>th</sup>, and 84<sup>th</sup> percentiles for each model in the external validation cohort**

|                                 | Codified+NLP        | Codified-only       | CHARGE-AF           |
|---------------------------------|---------------------|---------------------|---------------------|
|                                 | HR (95% CI)         | HR (95% CI)         | HR (95% CI)         |
| ≥ 84 <sup>th</sup> percentile   | 17.74 (13.59-23.16) | 13.26 (10.47-16.78) | 14.60 (11.37-18.77) |
| 50-<84 <sup>th</sup> percentile | 5.67 (4.34-7.43)    | 4.26 (3.36-5.41)    | 5.24 (4.07-6.74)    |
| 16-<50 <sup>th</sup> percentile | 2.41 (1.82-3.20)    | 2.01 (1.56-2.58)    | 2.23 (1.71-2.90)    |
| < 16 <sup>th</sup> percentile   | -                   | -                   | -                   |

AF: atrial fibrillation; NLP: natural language processing; CI: confidence interval

**Table S7. Percentile-based net reclassification improvement (NRI) with groups determined by 16<sup>th</sup>, 50<sup>th</sup>, 84<sup>th</sup> percentile of each model in external validation cohort**

|                                   | Overall NRI<br>(95% CI) | Event NRI<br>(95% CI)   | Non-event NRI<br>(95% CI) |
|-----------------------------------|-------------------------|-------------------------|---------------------------|
| Codified+NLP vs.<br>CHARGE-AF     | 0.044 (0.018 - 0.069)   | 0.040 (0.016 – 0.064)   | 0.003 (-0.003 – 0.010)    |
| Codified-only vs.<br>CHARGE-AF    | 0.001 (-0.025 - 0.026)  | -0.003 (-0.026 – 0.021) | 0.004 (-0.002 – 0.011)    |
| Codified+NLP vs.<br>Codified-only | 0.051 (0.027 - 0.072)   | 0.055 (0.033 – 0.075)   | -0.004 (-0.010 – 0.002)   |

NRI: net reclassification improvement; NLP: natural language processing; CI: confidence interval; CHARGE-AF: Cohorts for Heart and Aging Research in Genomic Epidemiology Atrial Fibrillation



**Table S8. C-statistics and hazard ratios in external validation cohort over 3-years of follow-up**

|                                 | <b>C-statistic<br/>(95% CI)</b> | <b>Hazard Ratio<br/>(95% CI)</b> |
|---------------------------------|---------------------------------|----------------------------------|
| Codified+NLP                    | 0.758 (0.746-0.769)*            |                                  |
| ≥ 84 <sup>th</sup> percentile   |                                 | 19.36 (14.29-26.21)              |
| 50-<84 <sup>th</sup> percentile |                                 | 5.93 (4.37)                      |
| 16-<50 <sup>th</sup> percentile |                                 | 2.39 (1.73-3.30)                 |
| < 16 <sup>th</sup> percentile   |                                 | -                                |
| Codified-only                   | 0.745 (0.733-0.757)             |                                  |
| ≥ 84 <sup>th</sup> percentile   |                                 | 13.22 (10.15-17.23)              |
| 50-<84 <sup>th</sup> percentile |                                 | 4.35 (3.33-5.69)                 |
| 16-<50 <sup>th</sup> percentile |                                 | 1.79 (1.34-2.38)                 |
| < 16 <sup>th</sup> percentile   |                                 | -                                |
| CHARGE-AF                       | 0.741 (0.730-0.753)             |                                  |
| ≥ 84 <sup>th</sup> percentile   |                                 | 16.89 (12.51-22.82)              |
| 50-<84 <sup>th</sup> percentile |                                 | 6.00 (4.43-8.12)                 |
| 16-<50 <sup>th</sup> percentile |                                 | 2.44 (1.78-3.36)                 |
| < 16 <sup>th</sup> percentile   |                                 | -                                |

CI: confidence interval, NLP: natural language processing; CHARGE-AF: Cohorts for Heart and Aging Research in Genomic Epidemiology Atrial Fibrillation

\* p<0.001 comparing C-statistic in Codified+NLP compared to codified-only and CHARGE-AF

**Figure S1. Prevalence of features identified by codified data only, NLP data only, and by both codified and NLP data among those where both the codified and NLP version were selected for inclusion in the codified+NLP model in the development cohort**

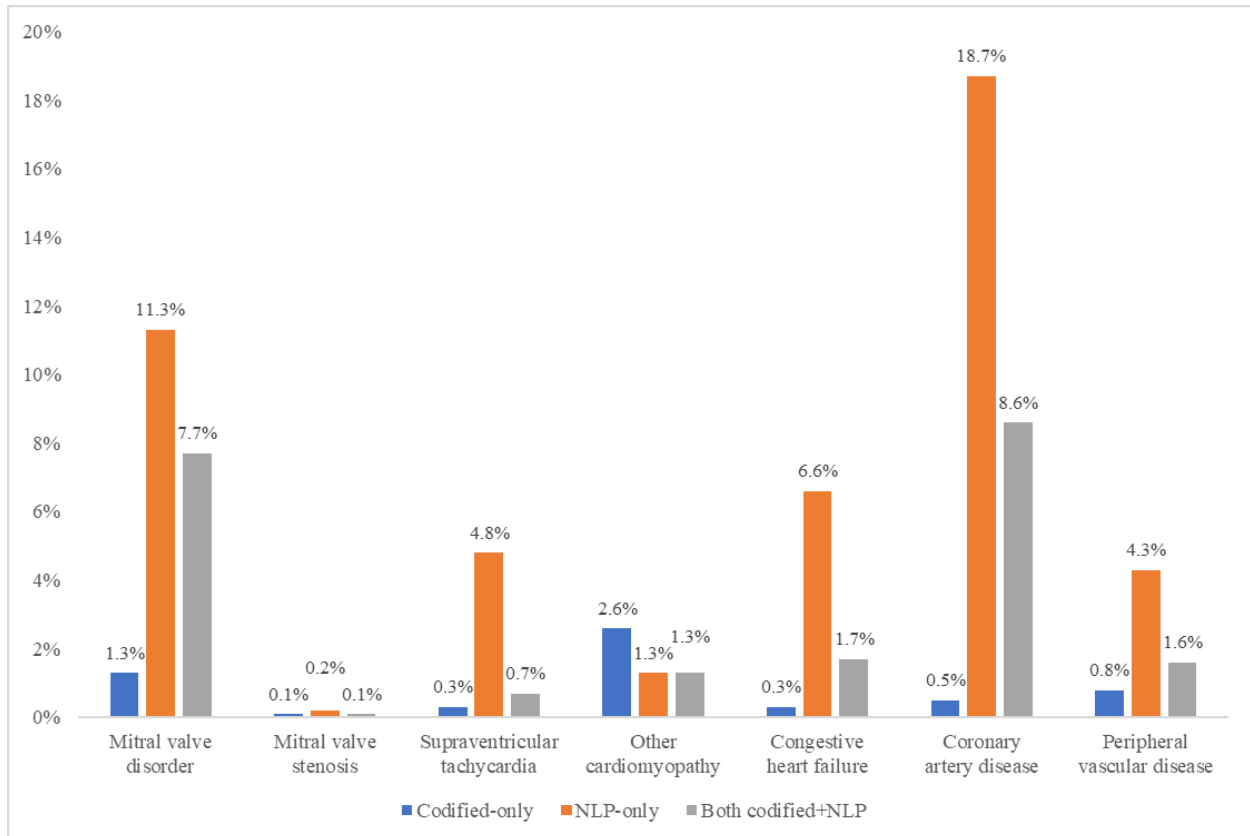

NLP: natural language processing

**Figure S2. Plot of observed 5-year AF risk versus predicted 5-year AF risk for recalibrated CHARGE-AF with patients divided into risk groups based on deciles in the internal validation cohort**

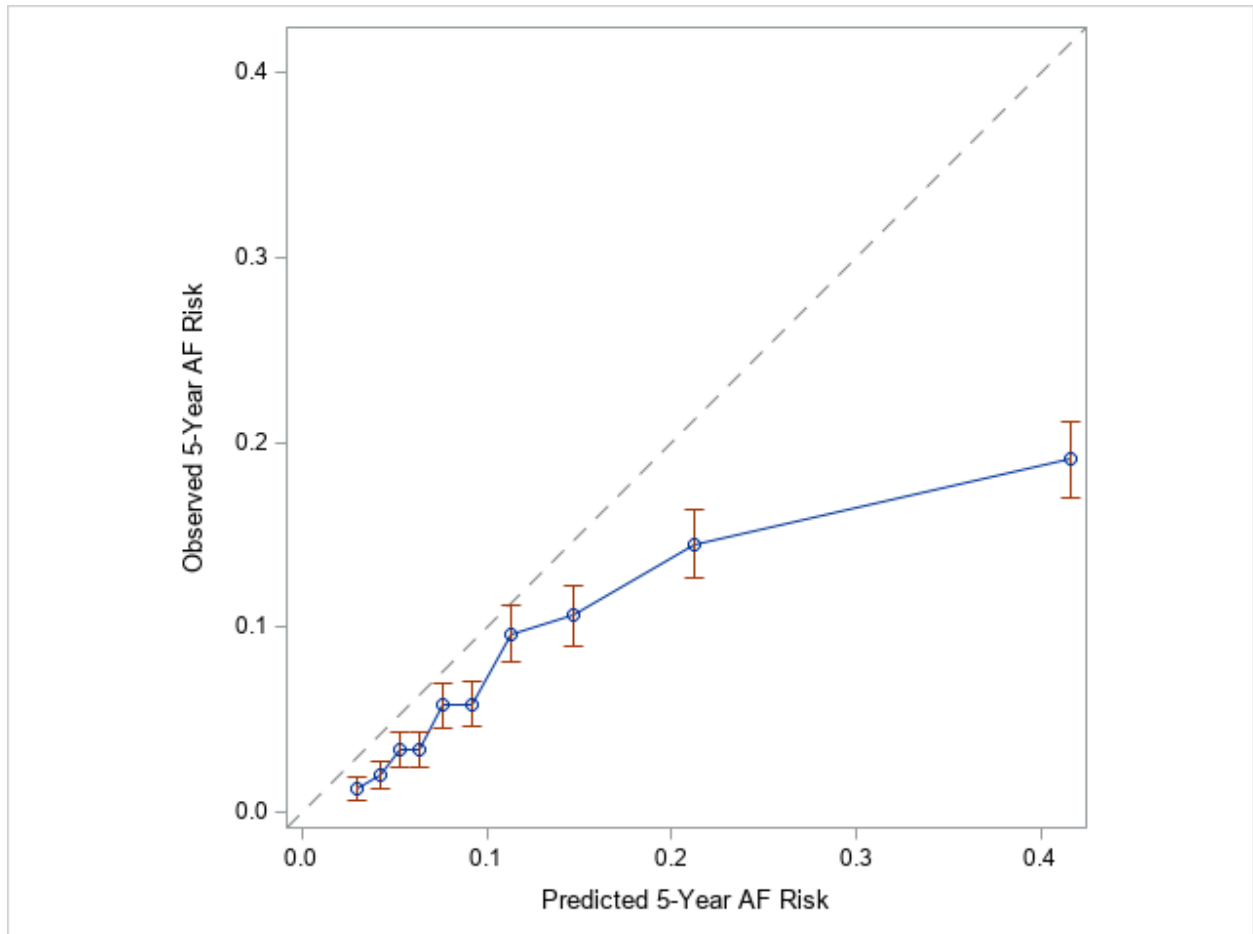

AF: atrial fibrillation; CHARGE-AF: Cohorts for Heart and Aging Research in Genomic Epidemiology Atrial Fibrillation

**Figure S3. Cumulative incidence plots stratified by groups of predicted risk for codified + NLP, codified-only, and CHARGE-AF models in external validation cohort**

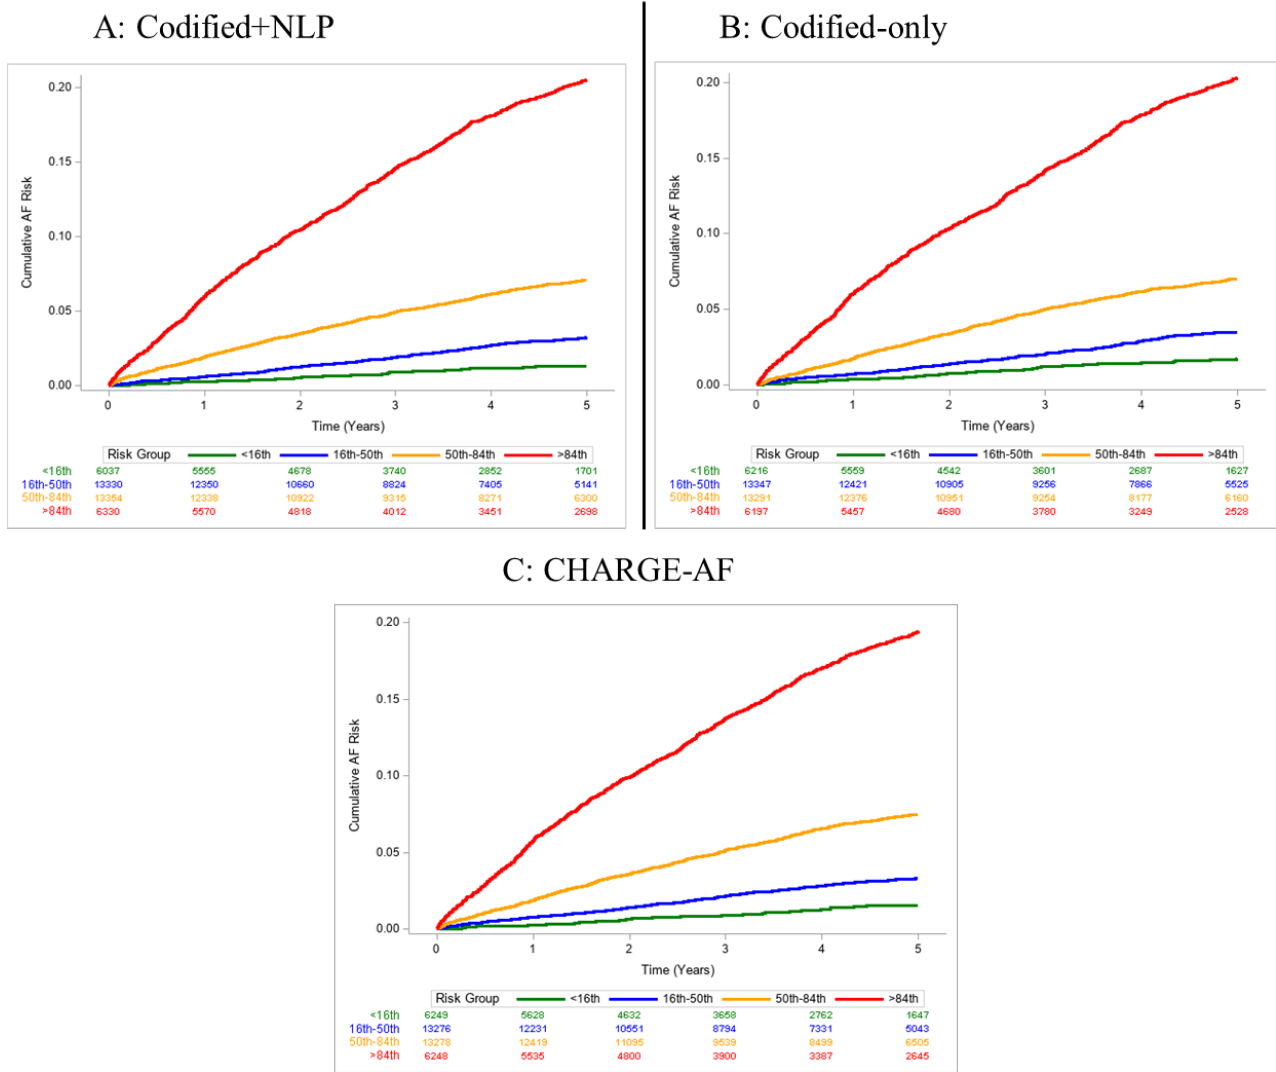

NLP: natural language processing; AF: atrial fibrillation; CHARGE-AF: Cohorts for Heart and Aging Research in Genomic Epidemiology Atrial Fibrillation

**Figure S4. Plots of observed 5-year AF risk versus predicted 5-year AF risk with patients divided into risk groups based on deciles in external validation cohort**

**A: Codified+NLP**

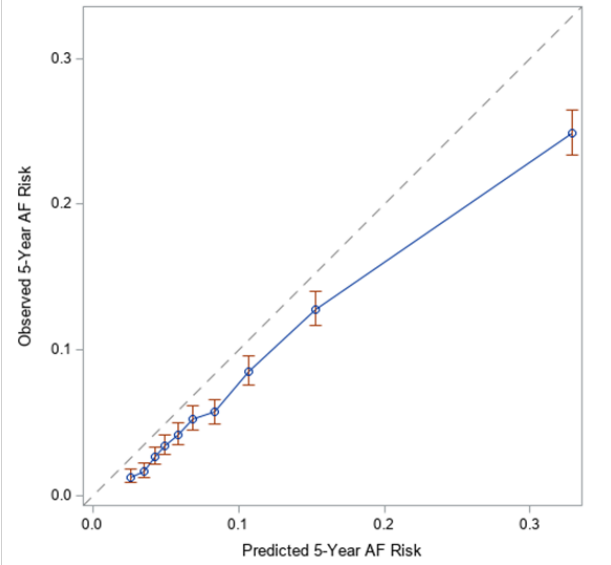

**B: Codified-only**

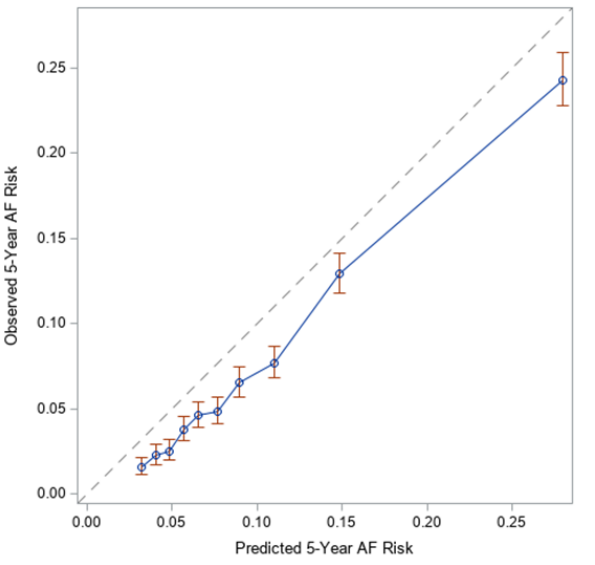

AF: atrial fibrillation; NLP: natural language processing

**Figure S5. Cumulative incidence plots stratified by groups of predicted risk for codified + NLP, codified-only, and CHARGE-AF models in external validation cohort over 3-years of follow-up**

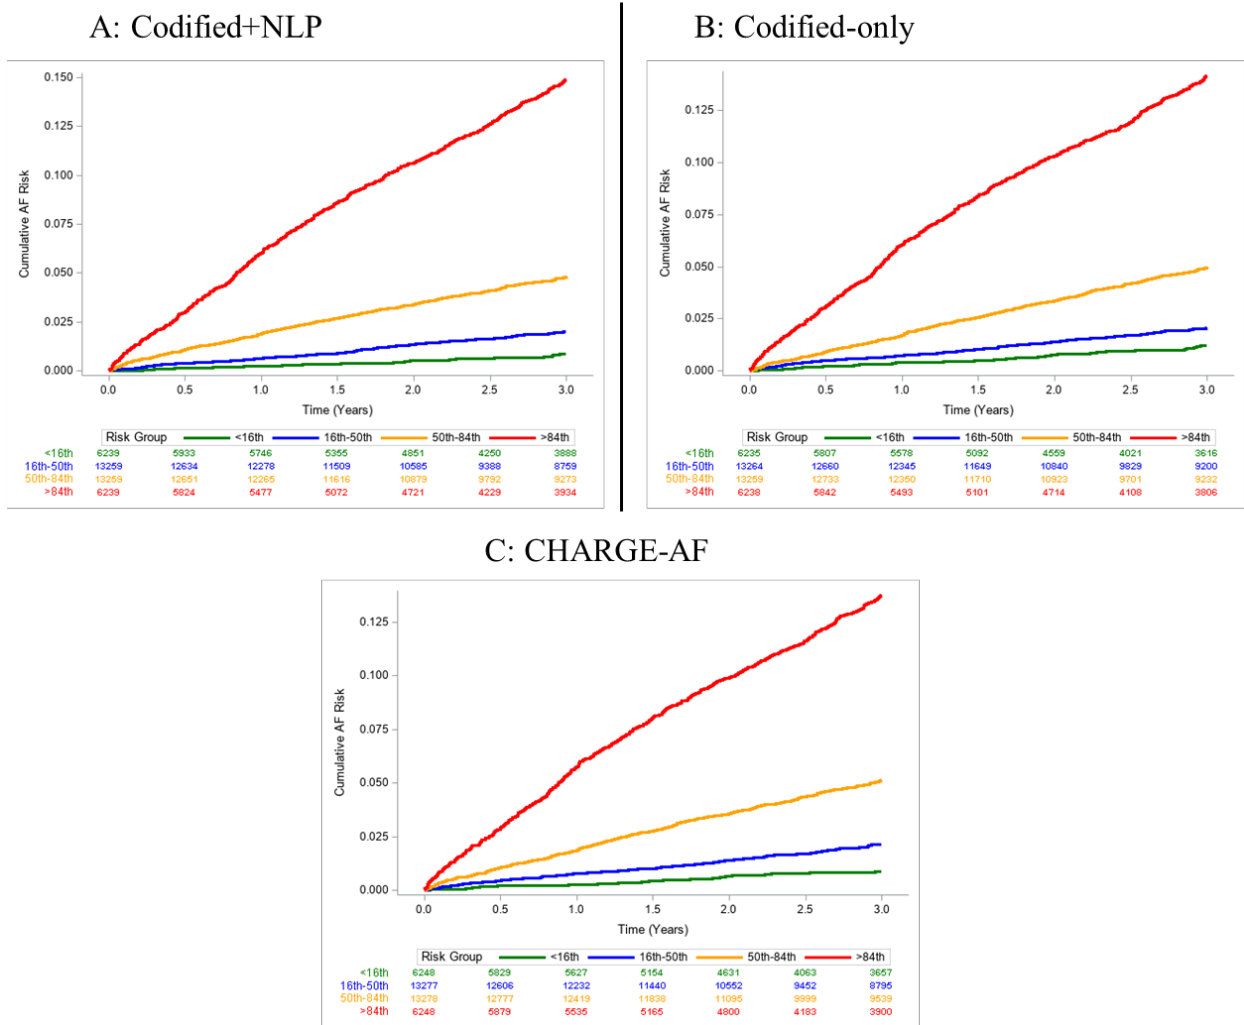

NLP: natural language processing; CHARGE-AF: Cohorts for Heart and Aging Research in Genomic Epidemiology Atrial Fibrillation; AF: atrial fibrillation

**Figure S6. Plots of observed 3-year AF risk versus predicted 3-year AF risk with patients divided into risk groups based on deciles in external validation cohort**

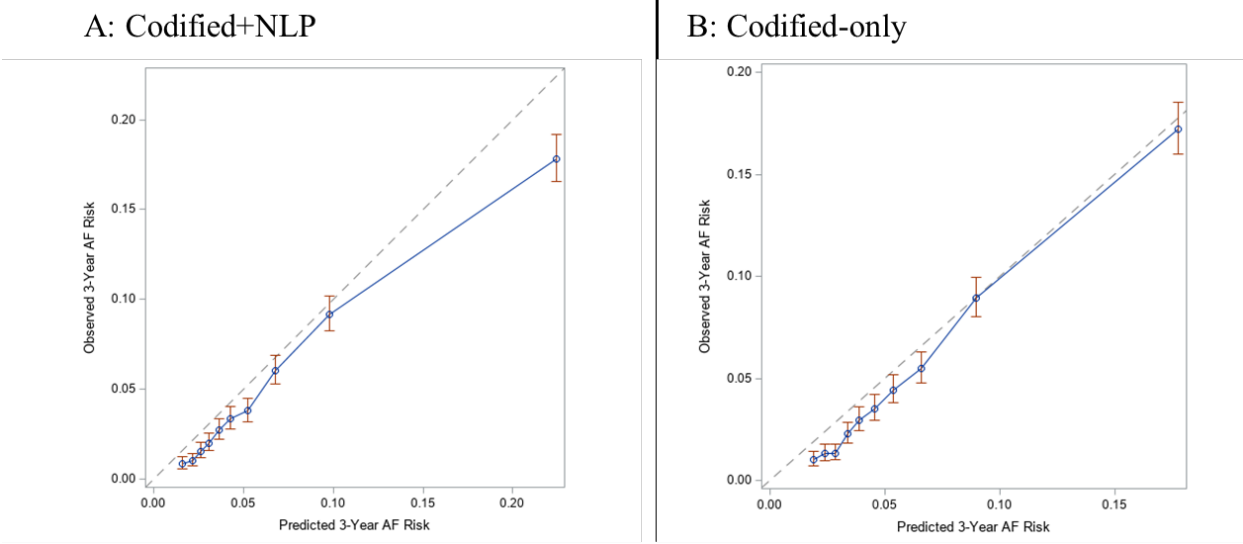

AF: atrial fibrillation; NLP: natural language processing
